# Supplementary material
Source: Springer Nature journal article supplement (https://www.springermedizin.de/resource/supplementary/12883_2013_885_MOESM3_ESM.pdf/9456086)
Supplement: MOESM3 [file 9456086]

## Inclusion-CRF

At the time of inclusion into the study

### Time point 1\*

0-31h

### Time point 2<sup>#§</sup>

31-55h

31-96h

### Time point 3<sup>#</sup>

7d

5-9d

### Time point 4<sup>#</sup>

14d

11-28d

### Time point 5<sup>#</sup>

10w

8-12w

### Injury

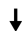

0h 24h 48h 96h 1w 2w // 4w // 8w 12w

\* Blood collection before surgery (if feasible)

<sup>#</sup> Blood collection between 07:00 and 11:00 am

<sup>§</sup> Time point 2 earliest at the day following Time point 1

 Precise timing

 Time window
